# Supplementary material
Source: HighWire-hosted journal article supplement (https://diabetes.diabetesjournals.org/content/suppl/2006/07/28/55.8.2265)

Supplemental Data  
Fig. 1 Concordance

A.  
MOB Congenic Interval

B.  
QTLs for Insulin Resistance Related Traits

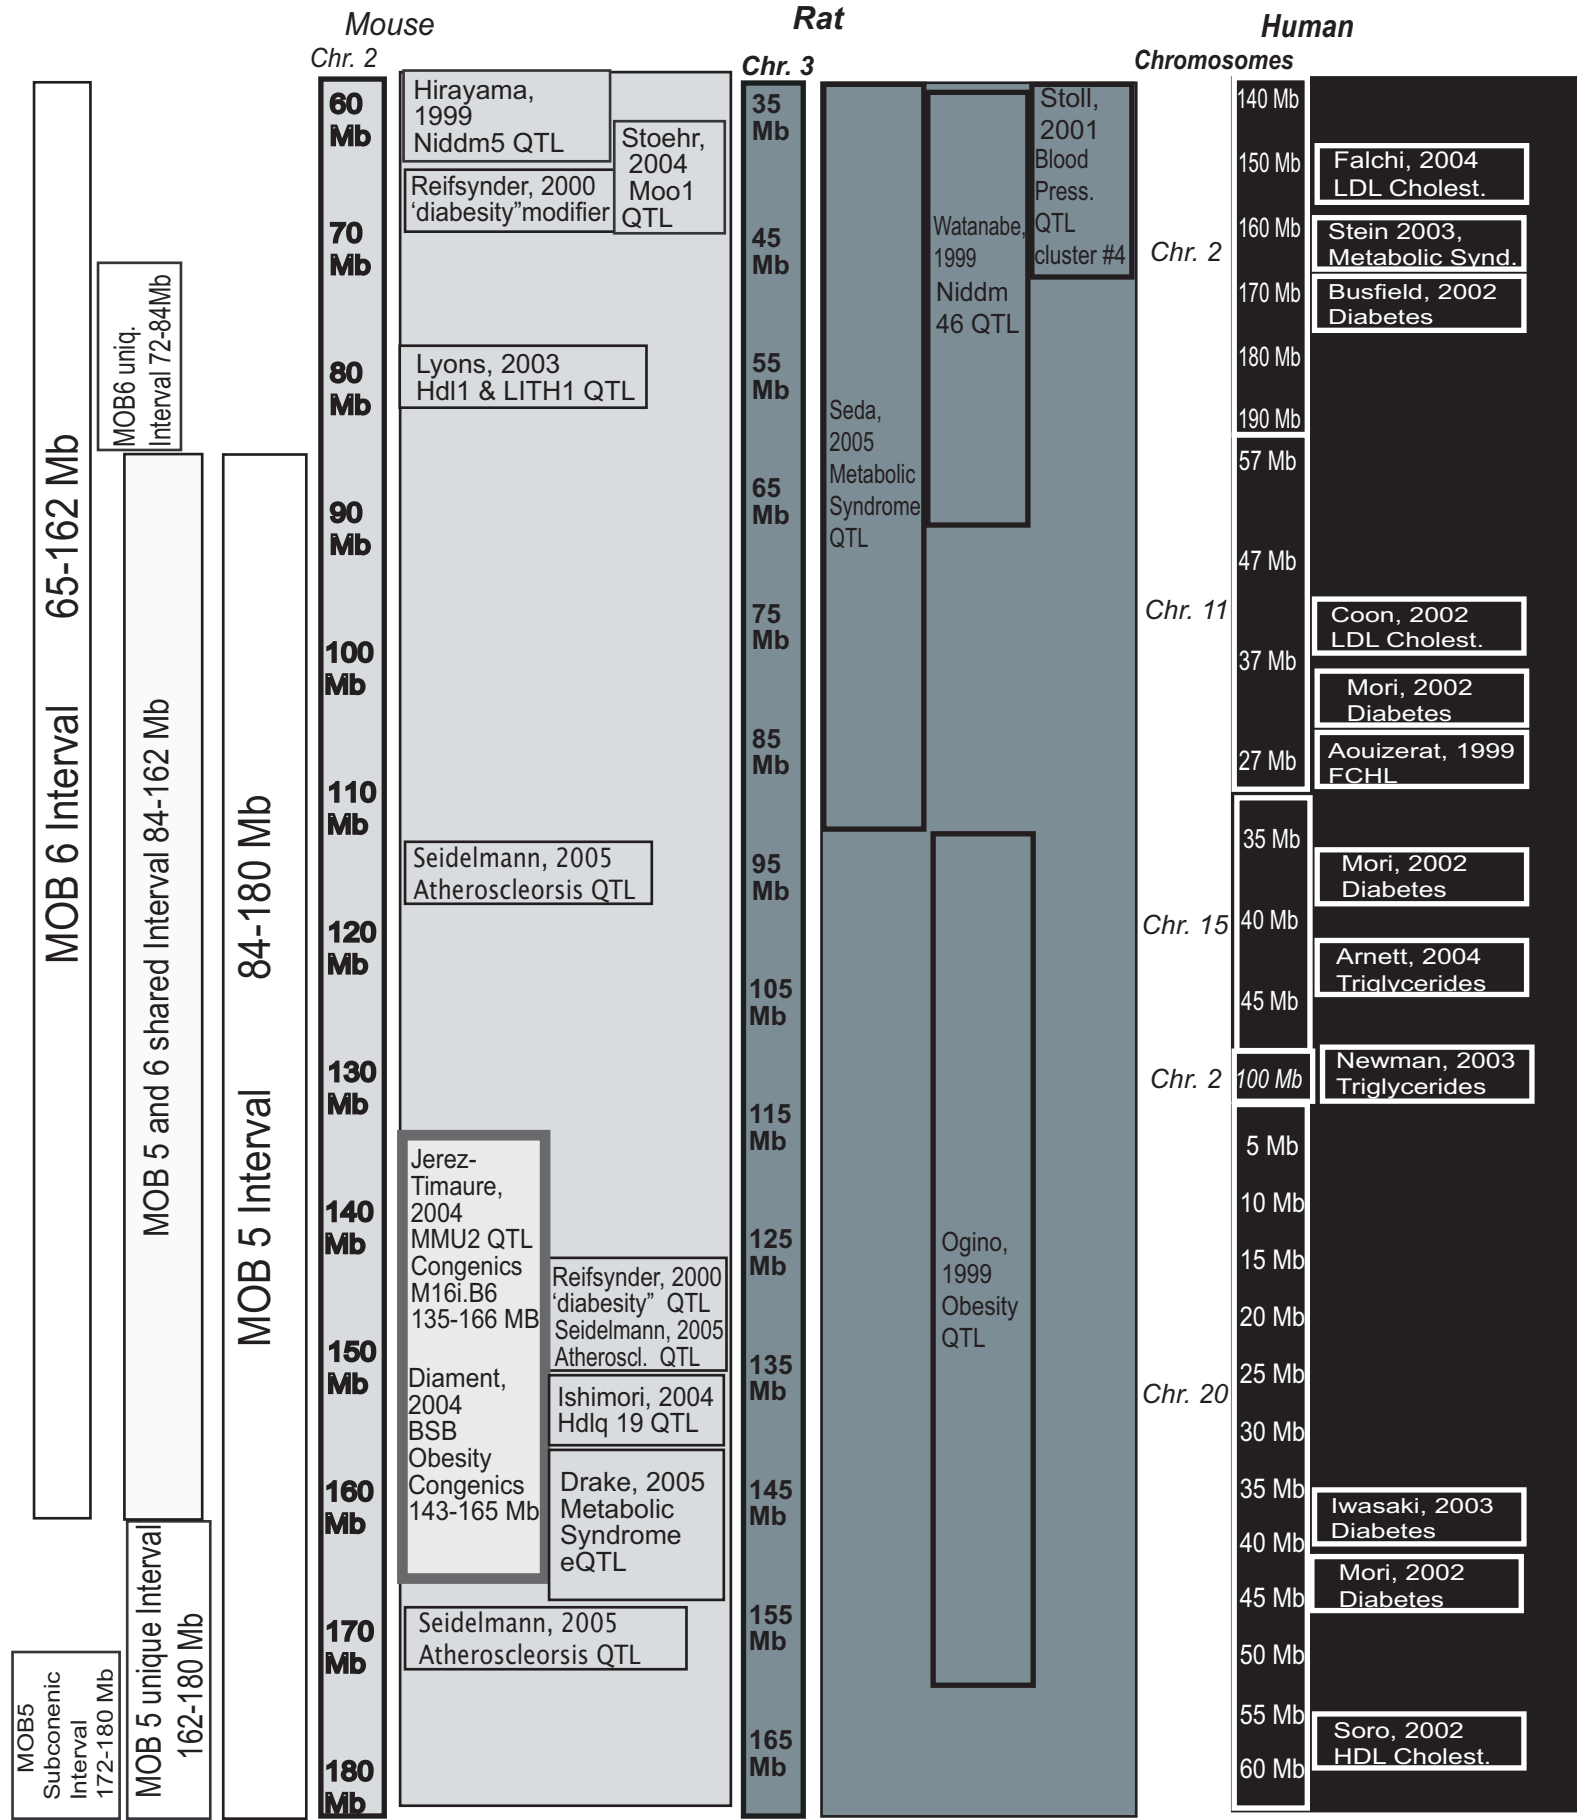

Supplement: PG2265OnlineAppendixFig1.pdf [file PG2265OnlineAppendixFig1.pdf]
