# Supplementary material
Source: HighWire-hosted journal article supplement (https://diabetes.diabetesjournals.org/content/suppl/2006/07/28/55.8.2265)
Supplement: PG2265OnlineAppendixFig1Legend.pdf [file PG2265OnlineAppendixFig1Legend.pdf]

## Supplemental Fig. 1

### **The MOB 5 and 6 congenic loci are concordant to insulin resistance related QTLs in homologous genomic intervals of numerous mouse and rat strains and multiple human populations.**

A) Map of MOB 5 and 6 congenic intervals indicating the shared overlap as well as the intervals unique to each congenic.

B) Map of QTLs for Insulin Resistance Related Traits

Mouse: Boxes show the position of peak lod for QTLs related to cardiovascular complications of insulin resistance. A lighter vertical rectangle shows the boundaries of 2 congenic strains affecting growth and obesity.

Rat: Grey rectangles show concordant QTL interval on rat chromosome 3.

Human: Black rectangles show position of peak markers for syntenic loci on human chromosomes 2, 11, 15, and 20.

## References for Supplemental Fig. 1

Aouizerat BE, Allayee H, Cantor RM, et. al. (1999) A genome scan for familial combined hyperlipidemia reveals evidence of linkage with a locus on chromosome 11. *Am. J. Hum. Genet.* 65:397-412.

Arnett DK, Miller MB, Coon H, et. al. (2004) Genome-wide linkage analysis replicates susceptibility locus for fasting plasma triglycerides: NHLBI Family Heart Study. *Hum. Genet.* 115:468-474.

Busfield F, Duffy DL, Kesting JB, et. al. (2002) A genomewide search for type 2 diabetes-susceptibility genes in indigenous Australians. *Am. J. Hum. Genet.* 70:349-357.

Coon H, Eckfeldt JH, Leppert MF, et al. (2002) A genome-wide screen reveals evidence for a locus on chromosome 11 influencing variation in LDL cholesterol in the NHLBI Family Heart Study. *Hum. Genet.* 111:263-269.

Diament AL, Farahani P, Chiu S, Fislser J, Warden CH. (2004) A novel mouse Chromosome 2 congenic strain with obesity phenotypes. *Mamm. Genome.* 15:452-459.

Drake TA, Schadt EE, Davis RC, Lusis AJ (2005) Integrating genetic and gene expression data to study the metabolic and diabetes in mice. *Am.J.Ther.* 12: 503-511

Falchi M, Forabosco P, Mocci E, et. al. (2004) A genomewide search using an original pairwise sampling approach for large genealogies identifies a new locus for total and low-density lipoprotein cholesterol in two genetically differentiated isolates of Sardinia. *Am. J. Hum. Genet.* 75:1015-1031.

Hirayama I, Yi Z, Izumi S, Arai I, Suzuki W, et al. (1999) Genetic analysis of obese diabetes in the TSOD mouse. *Diabetes*. 48:1183-1191

Ishimori N, Li R, Kelmenson PM, et al. (2004) Quantitative trait loci analysis for plasma HDL-cholesterol concentrations and atherosclerosis susceptibility between inbred mouse strains C57BL/6J and 129S1/SvImJ. *Arterioscler. Thromb. Vasc. Biol.* 24:161-166.

Iwasaki N, Cox NJ, Wang YQ, et al. (2003) Mapping genes influencing type 2 diabetes risk and BMI in Japanese subjects. *Diabetes*. 52:209-213.

Jerez-Timaure NC, Kearney F, Simpson EB, et al. (2004) Characterization of QTL with major effects on fatness and growth on mouse chromosome 2. *Obes. Res.* 12:1408-1420.

Lyons MA, Wittenburg H, Li R, et al. (2003) Quantitative trait loci that determine lipoprotein cholesterol levels in DBA/2J and CAST/Ei inbred mice. *J. Lipid Res.* 44:953-967.

Mori Y, Otabe S, Dina C, et al. (2005) Genome-wide search for type 2 diabetes in Japanese affected sib-pairs confirms susceptibility genes on 3q, 15q, and 20q and identifies two new candidate Loci on 7p and 11p. *Diabetes*. 1:1247-1255.

Newman DL, Abney M, Dytch H, et al. (2003) Major loci influencing serum triglyceride levels on 2q14 and 9p21 localized by homozygosity-by-descent mapping in a large Hutterite pedigree. *Hum. Mol. Genet.* 12:137-144.

Ogino T, Moralejo DH, Zhu M, et al. (1999) Identification of possible quantitative trait loci responsible for hyperglycaemia after 70% pancreatectomy using a spontaneously diabetogenic rat. *Genet. Res.* 73:29-36.

Reifsnyder PC, Churchill G, Leiter EH. (2000) Maternal environment and genotype interact to establish diabetes in mice. *Genome Res.* 10:1568-1578.

Seda O, Liska F, Krenova D, et al. (2005) Dynamic genetic architecture of metabolic syndrome attributes in the rat. *Physiol. Genomics.* 21: 243-252.

Seidelmann SB, De Luca C, Leibel RL, et al. (2005) Quantitative trait locus mapping of genetic modifiers of metabolic syndrome and atherosclerosis in low-density lipoprotein receptor-deficient mice: identification of a locus for metabolic syndrome and increased atherosclerosis on chromosome 4. *Arterioscler. Thromb. Vasc. Biol.* 5: 204-210.

Soro A, Pajukanta P, Lilja HE, et. al. (2002) Genome scans provide evidence for low-HDL-C loci on chromosomes 8q23, 16q24.1-24.2, and 20q13.11 in Finnish families. *Am. J. Hum Genet.* 70: 1333-1340.

Stein CM, Song Y, Elston RC, et. al. (2003) Structural equation model-based genome scan for the metabolic syndrome. *BMC Genet.* 4: Suppl 1:S99.

Stoehr JP, Byers JE, Clee SM, et. al. (2004) Identification of major quantitative trait loci controlling body weight variation in ob/ob mice. *Diabetes.*;53:245-249.

Stoll M, Cowley AW Jr, Tonellato PJ, et al (2001) A genomic – systems biology map for cardiovascular function. *Science* 294: 1723-1726.

Watanabe TK, Okuno S, Oga K, et. al. (1999) Genetic dissection of "OLETF," a rat model for non-insulin-dependent diabetes mellitus: quantitative trait locus analysis of (OLETF x BN) x OLETF. *Genomics.* 58: 233-239.
