# Supplementary material
Source: HighWire-hosted journal article supplement (https://diabetes.diabetesjournals.org/content/suppl/2006/07/28/55.8.2265)

Fig. 2

Aortic Root Lesion Area

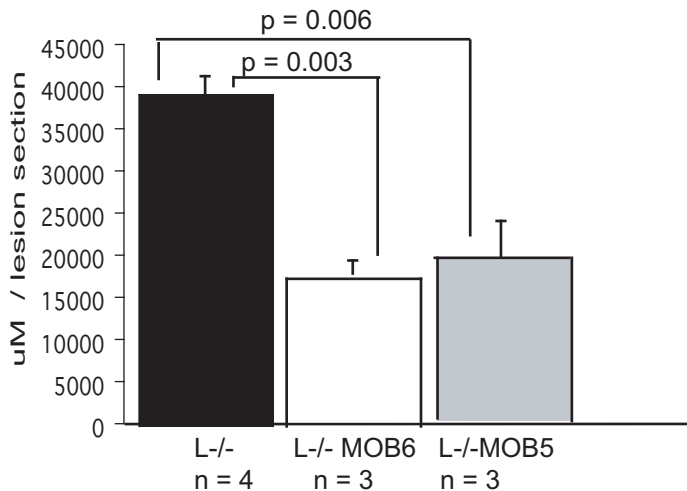

Triglycerides

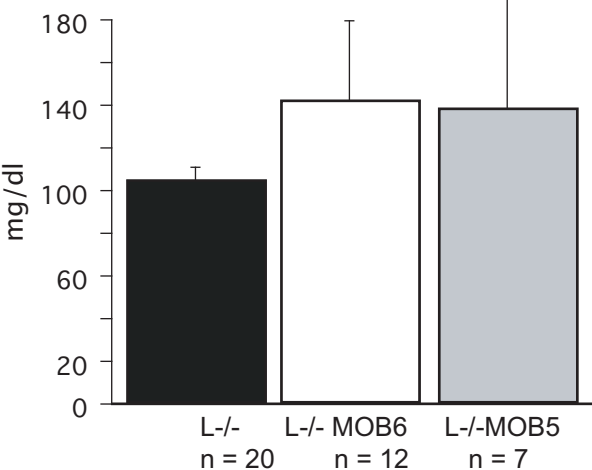

Free Fatty Acids

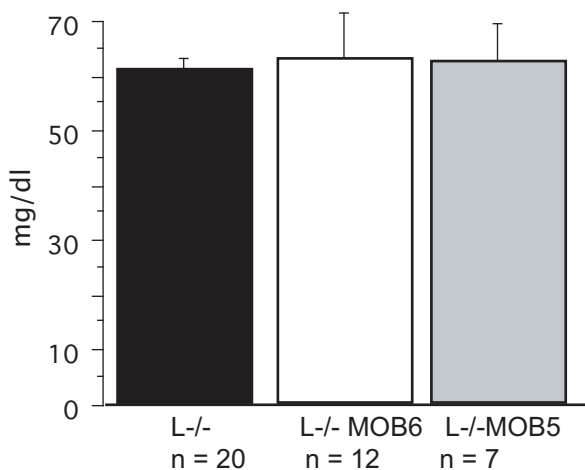

IPGTT LDLR-/- vs LDLR-/- MOB Congenic Chow

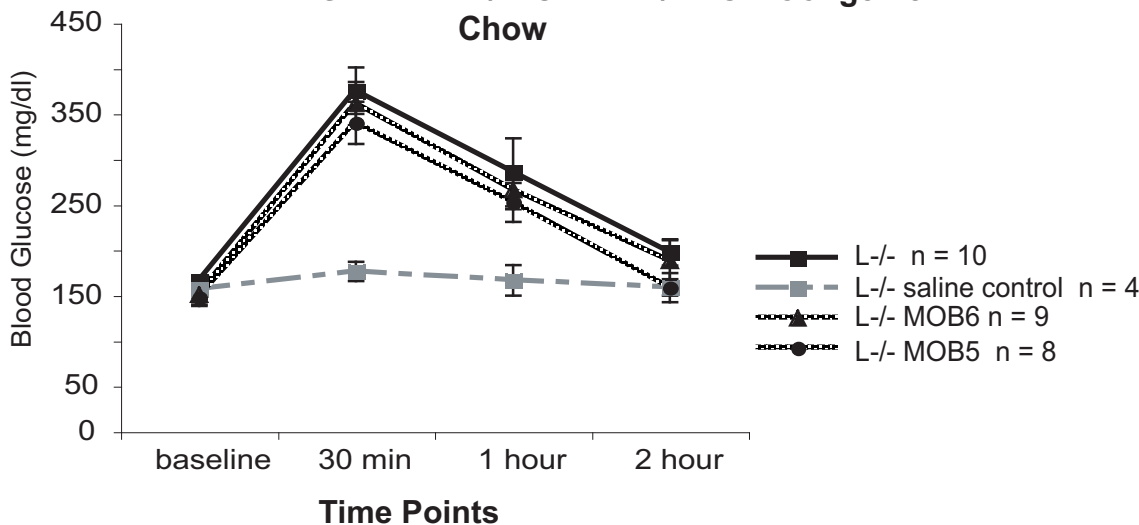

Supplement: PG2265OnlineAppendixFig2.pdf [file PG2265OnlineAppendixFig2.pdf]
