# Supplementary material
Source: HighWire-hosted journal article supplement (https://diabetes.diabetesjournals.org/content/suppl/2006/07/28/55.8.2265)

Fig. 3

## A. Weight Gain on Chow from 12-27 weeks

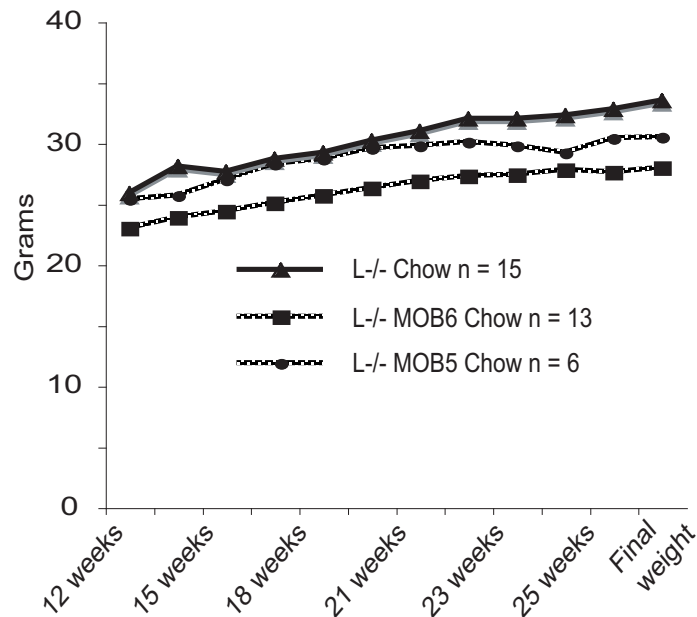

## B.

NMR - Chow Diet 16-18 weeks

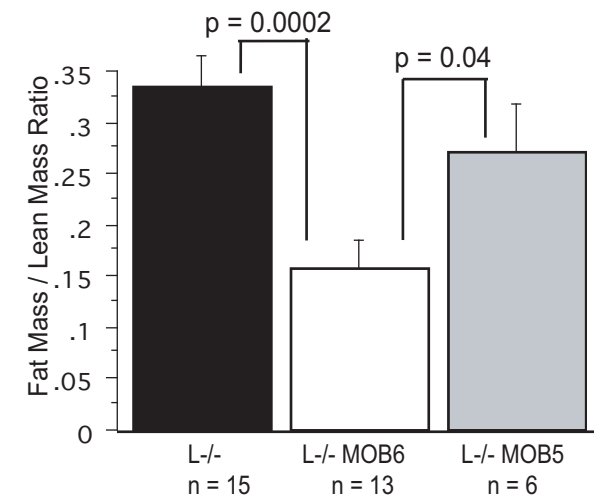

## C.

Fat Mass

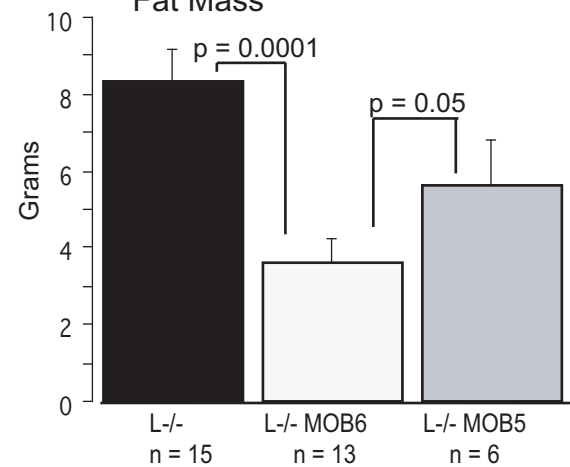

## D.

Lean Mass

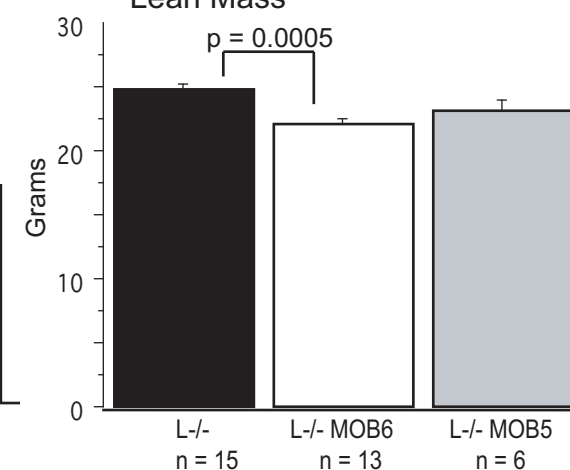

## E.

Food Intake (singly housed)

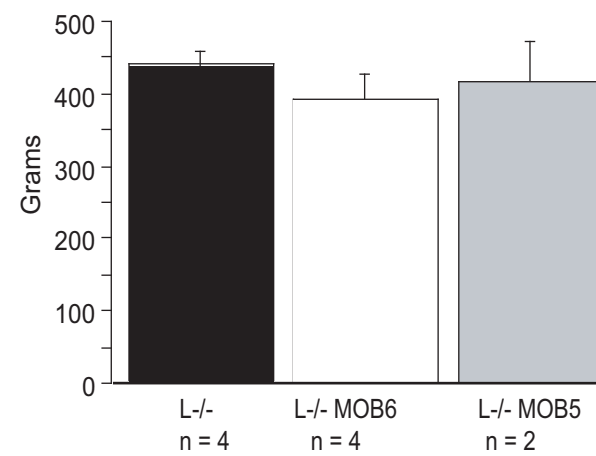

## F.

Food Efficiency

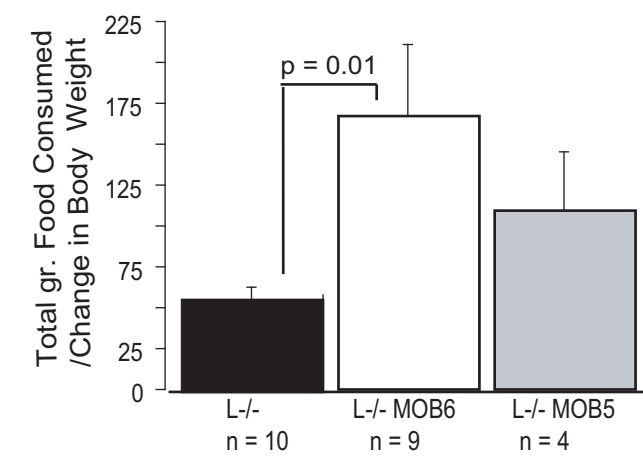

Supplement: PG2265OnlineAppendixFig3.pdf [file PG2265OnlineAppendixFig3.pdf]
