# Supplementary material
Source: HighWire-hosted journal article supplement (https://diabetes.diabetesjournals.org/content/suppl/2006/07/28/55.8.2265)

Figure 5

**A. IPGTT LDLR<sup>-/-</sup> vs MOB5 derived congenic Western Diet**

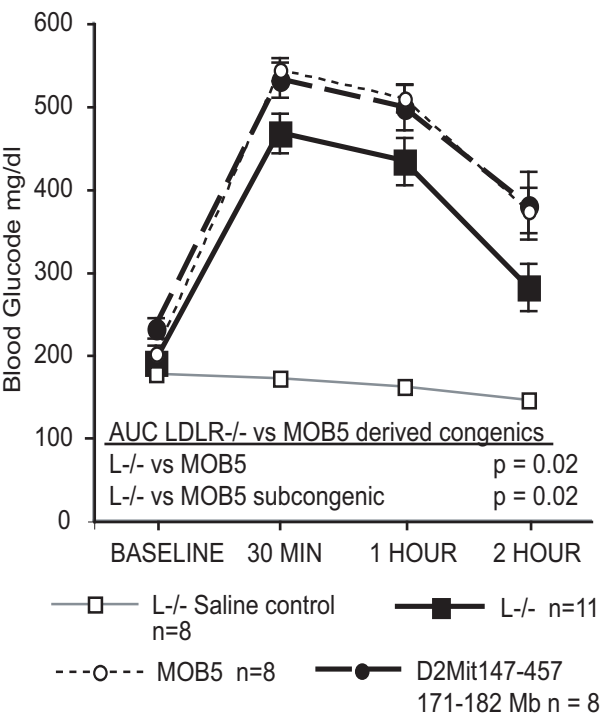

MOB5 congenics were backcrossed to B6 mice to create recombinants that localized CAST alleles from within the MOB5 unique interval from 172-182 Mb (B6.CAST-D2Mit147-D2Mit457) to create a MOB5 sub-congenic strain. Recombinants possessing CAST alleles within this genomic interval were intercrossed until this interval was homozygous for CAST alleles.

MOB5 sub-congenics began Western diet feeding at 8 weeks. At nineteen weeks of age after 10-11 weeks of Western diet feeding MOB5 subcongenics were compared to twenty seven week old parental MOB5 congenics and LDLR<sup>-/-</sup> controls fed a Western diet 16-18 weeks.

The MOB5 sub-congenics demonstrated significantly decreased glucose tolerance (AUC = 53,200) compared to LDLR<sup>-/-</sup> (AUC= 44,700) similar to that of the parental MOB5congenics (AUC = 53461). No significant differences in insulin sensitivity were observed between the MOB5 subcongenics (ISI = -3.1)and LDLR<sup>-/-</sup> controls (ISI = -3.4). However, given the decreased insulin sensitivity of the LDLR<sup>-/-</sup> the MOB5 sub-congenic were insulin resistant eventhough they were considerably younger than controls.

**B. ISI LDLR<sup>-/-</sup> vs MOB5 derived Congenics**

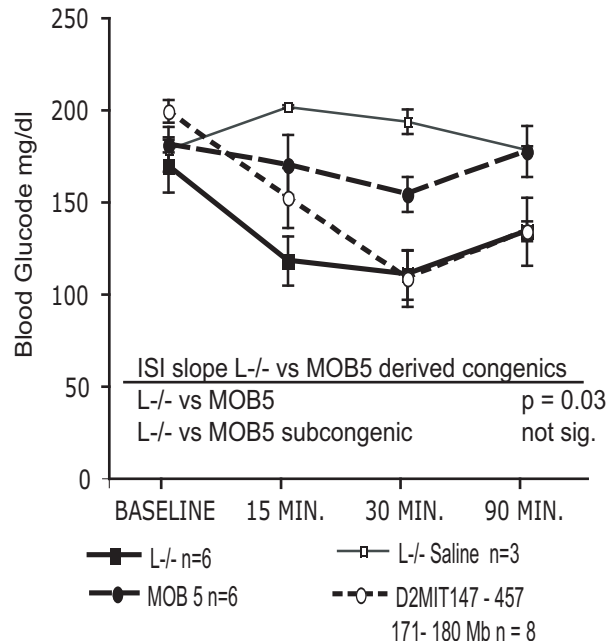

Supplement: PG2265OnlineAppendixFig5.pdf [file PG2265OnlineAppendixFig5.pdf]
