# Supplementary material
Source: HighWire-hosted journal article supplement (https://diabetes.diabetesjournals.org/content/suppl/2006/07/28/55.8.2265)

Fig. 4

## A. Total Cholesterol

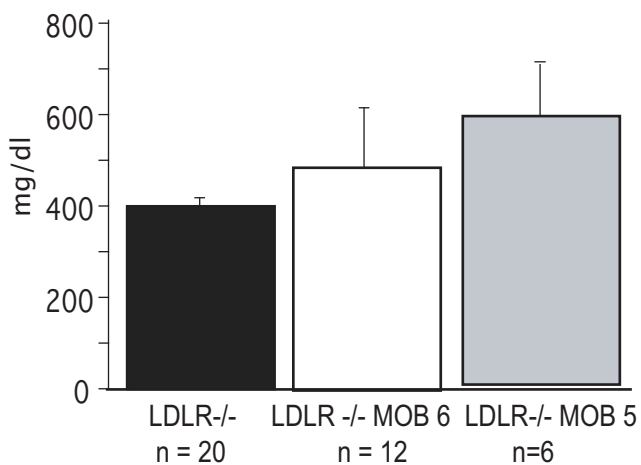

## B. HDL Cholesterol

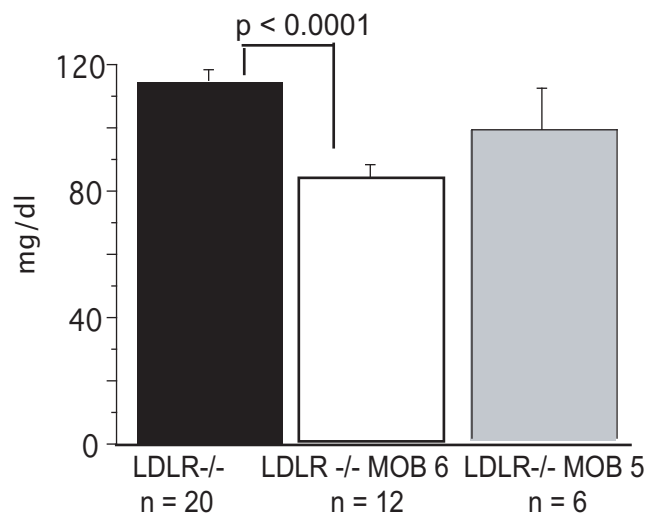

## C. LDL+VLDL Cholesterol

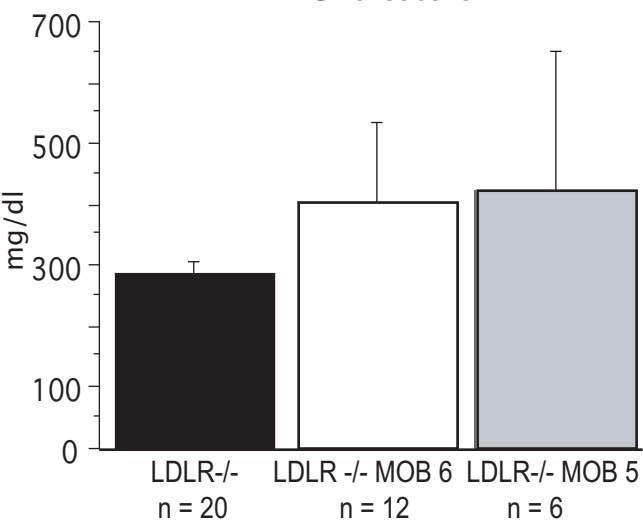

## D. Unesterified Cholesterol

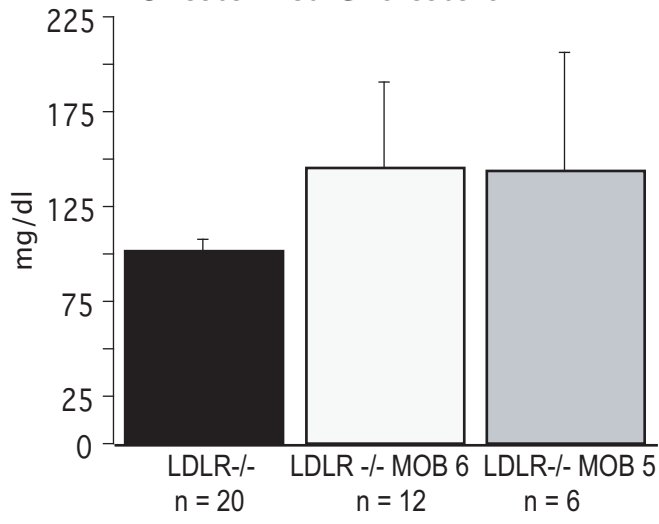

Supplement: PG2265OnlineAppendixFig4.pdf [file PG2265OnlineAppendixFig4.pdf]
